# Supplementary material for: Associations between Schistosomiasis and the Use of Human Waste as an Agricultural Fertilizer in China
Source: PubMed Central journal article supplement (PMC4295866; doi:10.1371/journal.pntd.0003444), 2015-01-15
Supplement: pntd.0003444.s002.pdf [file pntd.0003444.s002.pdf]

**Table S1.** Demographic characteristics of residents in 36 villages in Sichuan, China surveyed in 2007 and 2010.

|                     | 2007          |                                    | 2010          |                                    |
|---------------------|---------------|------------------------------------|---------------|------------------------------------|
|                     | Census<br>No. | Tested for<br>infection<br>No. (%) | Census<br>No. | Tested for<br>infection<br>No. (%) |
| Age                 |               |                                    |               |                                    |
| < 15 years          | 339           | 186 (55)                           | 143           | 78 (55)                            |
| 15 - 24 years       | 263           | 99 (38)                            | 179           | 42 (23)                            |
| 25 - 34 years       | 394           | 249 (63)                           | 211           | 88 (42)                            |
| 35 - 44 years       | 763           | 536 (70)                           | 584           | 355 (61)                           |
| 45 - 54 years       | 590           | 473 (80)                           | 477           | 333 (70)                           |
| ≥ 55 years          | 542           | 462 (85)                           | 693           | 469 (68)                           |
| Sex                 |               |                                    |               |                                    |
| Female              | 1431          | 1023 (71)                          | 1166          | 727 (62)                           |
| Male                | 1460          | 982 (67)                           | 1121          | 638 (57)                           |
| County of residence |               |                                    |               |                                    |
| County 1            | 1704          | 1141 (67)                          | 1409          | 762 (54)                           |
| County 2            | 1187          | 864 (73)                           | 878           | 603 (69)                           |
